# Supplementary material for: A draft genome and transcriptome of common milkweed (Asclepias syriaca) as resources for evolutionary, ecological, and molecular studies in milkweeds and Apocynaceae
Source: PubMed Central journal article supplement (PMC6756140; doi:10.7717/peerj.7649), 2019-09-20
Supplement: peerj-07-7649-s001.pdf [file peerj-07-7649-s001.pdf]

**SUPPLEMENTARY MATERIALS**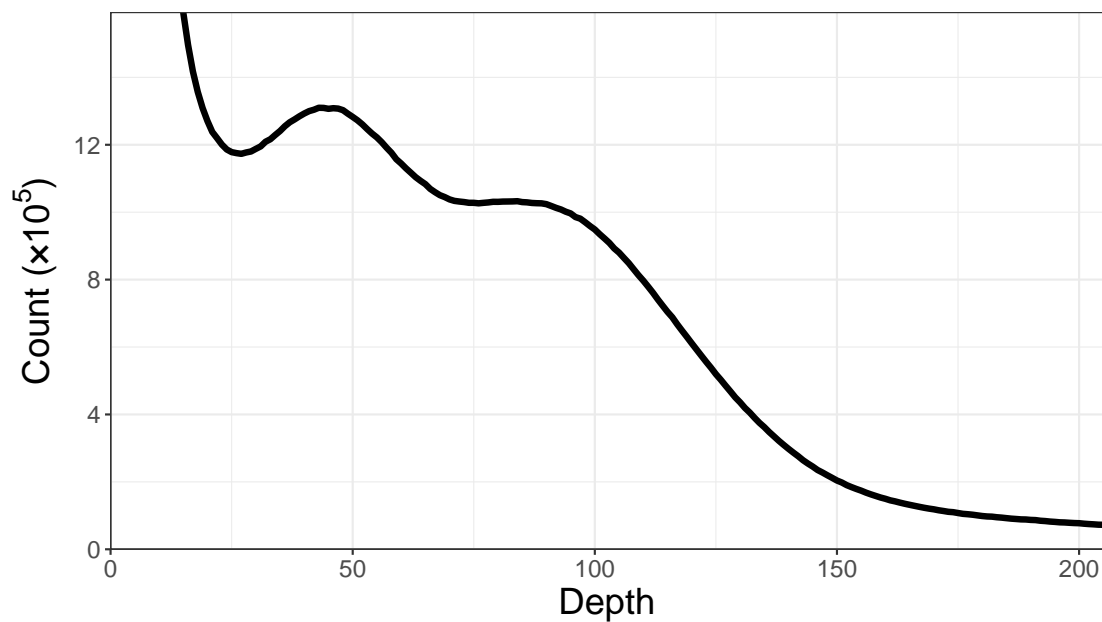

**Figure S1:** K-mer distribution of *Asclepias syriaca* genomic reads.

Depth is the number of times a certain 17 bp k-mer occurred in the genomic reads, and count is the number of different k-mers at that depth. K-mers with depths below 15 or above 205 are not shown. Within the read set analyzed, 629 million k-mers were unique. Peaks occur at 43× and 84× depth.

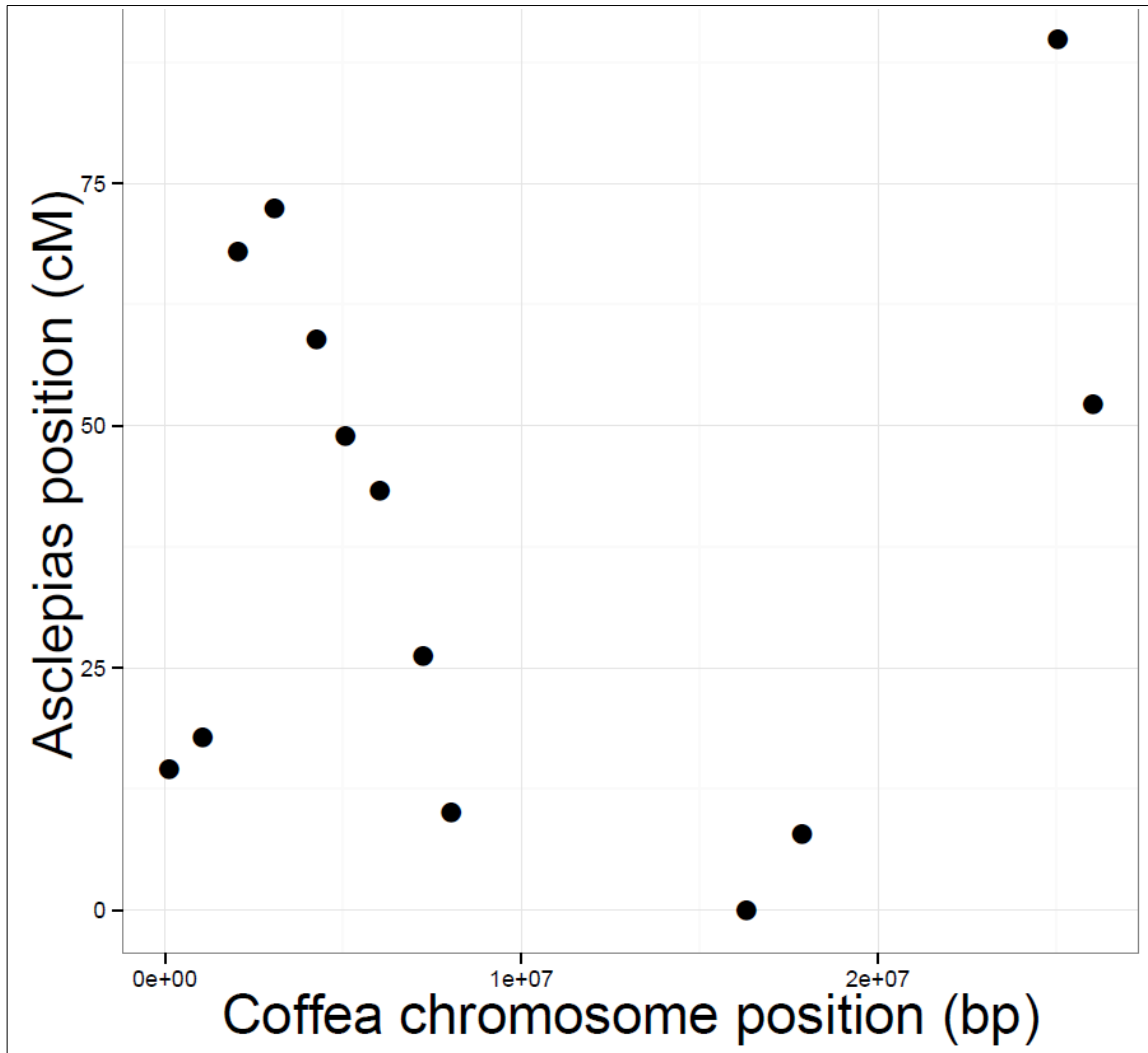

**Figure S2:** Synteny between *Asclepias* linkage group 2 and *Coffea* pseudochromosome 10.

A subset of scaffolds from *Asclepias* linkage group 2 mapped to their positions on *Coffea canephora* pseudochromosome 10, and ordered along the y-axis by recombination distance within *Asclepias*.

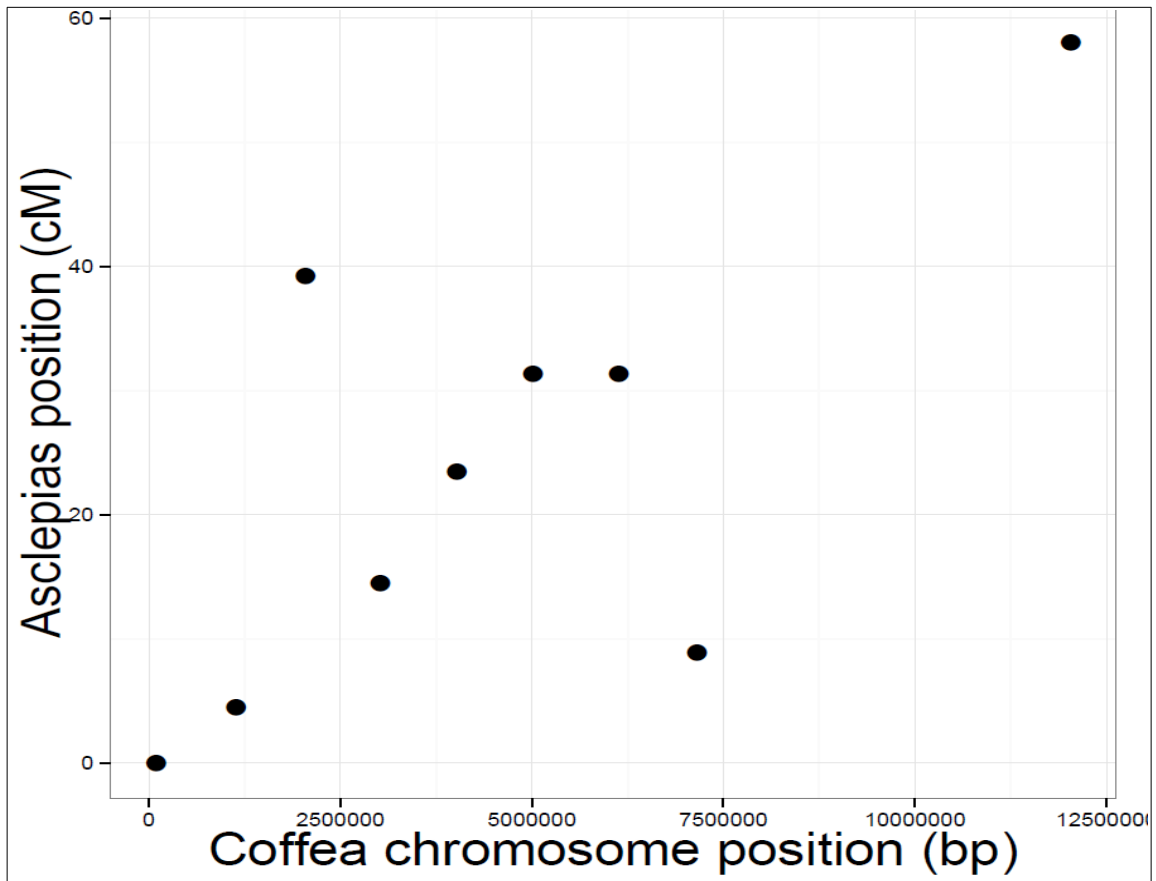

**Figure S3:** Synteny between *Asclepias* linkage group 8 and *Coffea* pseudochromosome 3.

A subset of scaffolds from *Asclepias* linkage group 8 mapped to their positions on *Coffea canephora* pseudochromosome 3, and ordered along the y-axis by recombination distance within *Asclepias*.

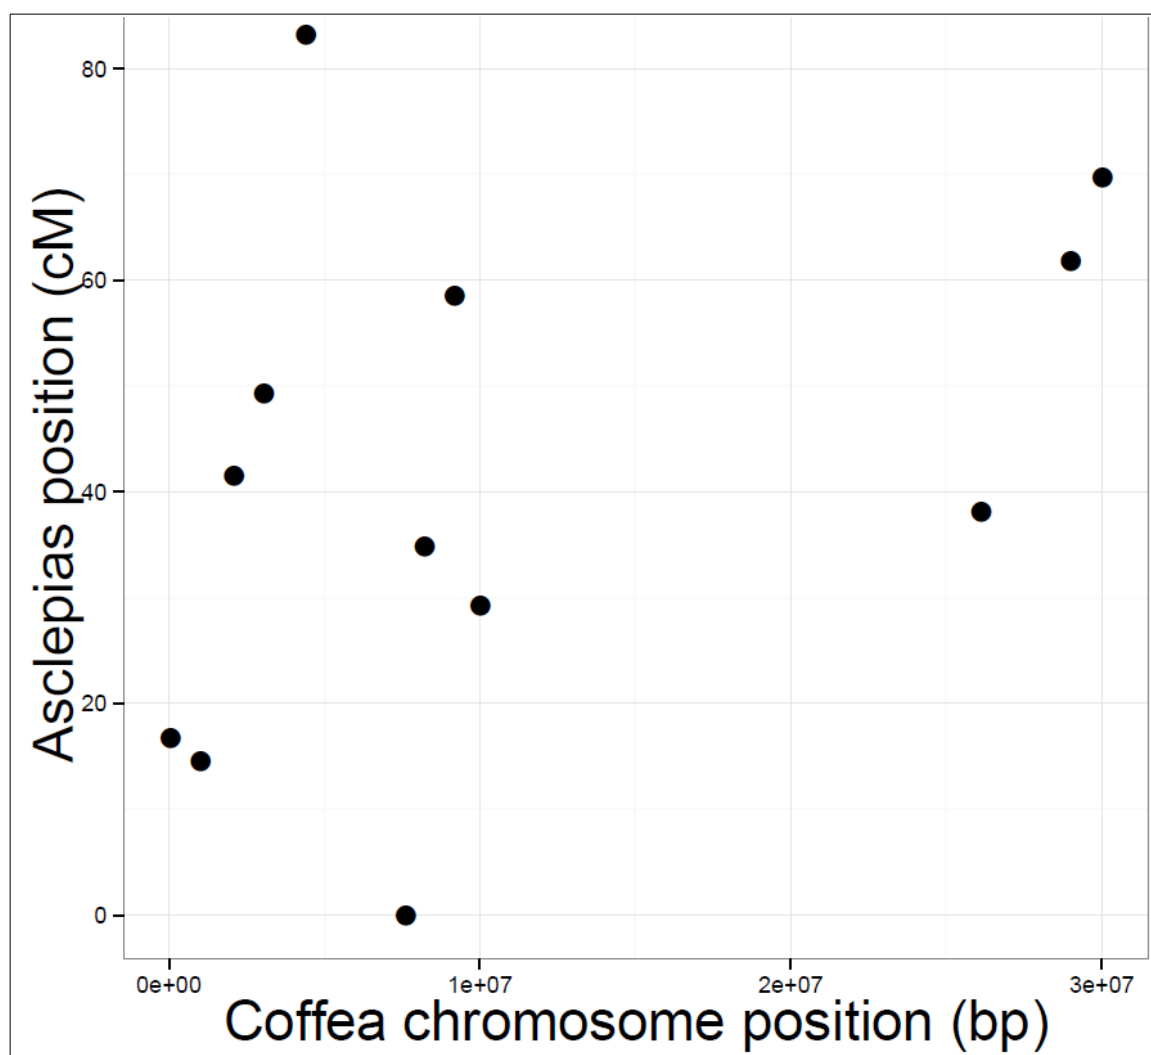

**Figure S4:** Synteny between *Asclepias* linkage group 4 and *Coffea* pseudo-chromosome 8.

A subset of scaffolds from *Asclepias* linkage group 4 mapped to their positions on *Coffea canephora* pseudo-chromosome 8, and ordered along the y-axis by recombination distance within *Asclepias*.

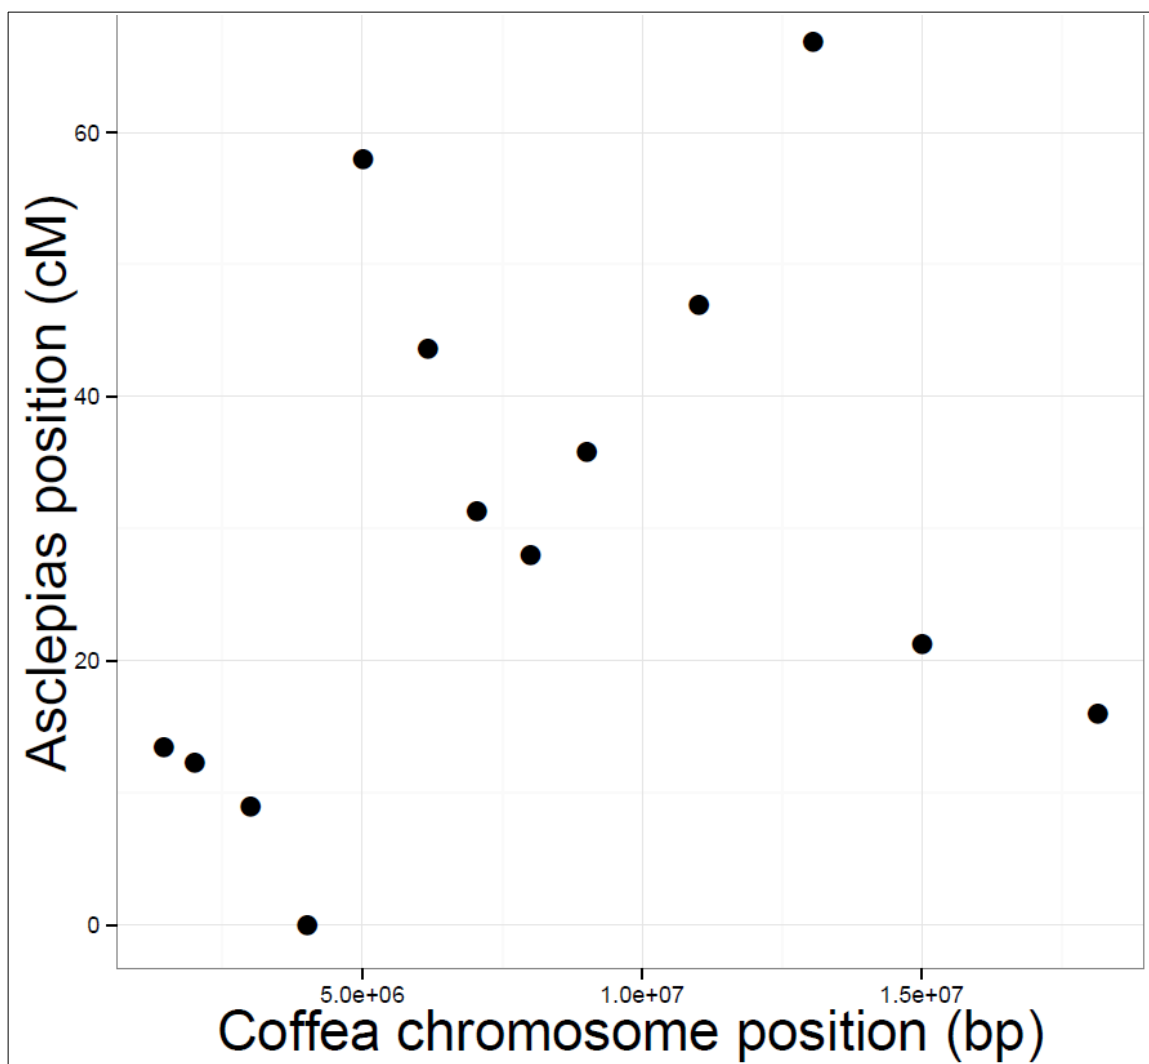

**Figure S5:** Synteny between *Asclepias* linkage group 6 and *Coffea* pseudochromosome 6.

A subset of scaffolds from *Asclepias* linkage group 6 mapped to their positions on *Coffea canephora* pseudochromosome 6, and ordered along the y-axis by recombination distance within *Asclepias*.

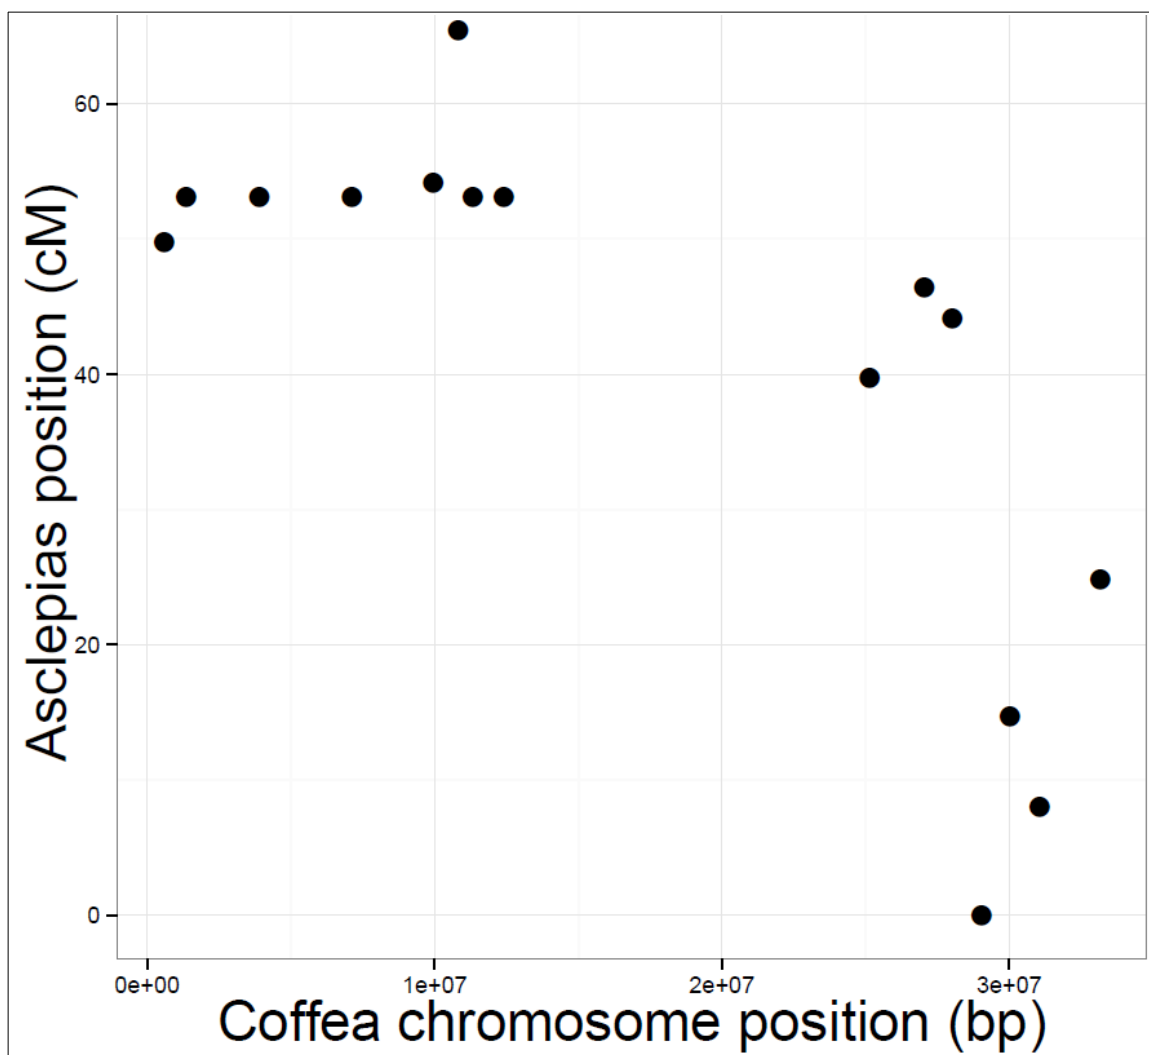

**Figure S6:** Synteny between *Asclepias* linkage group 7 and *Coffea* pseudo-chromosome 11.

A subset of scaffolds from *Asclepias* linkage group 7 mapped to their positions on *Coffea canephora* pseudo-chromosome 11, and ordered along the y-axis by recombination distance within *Asclepias*.

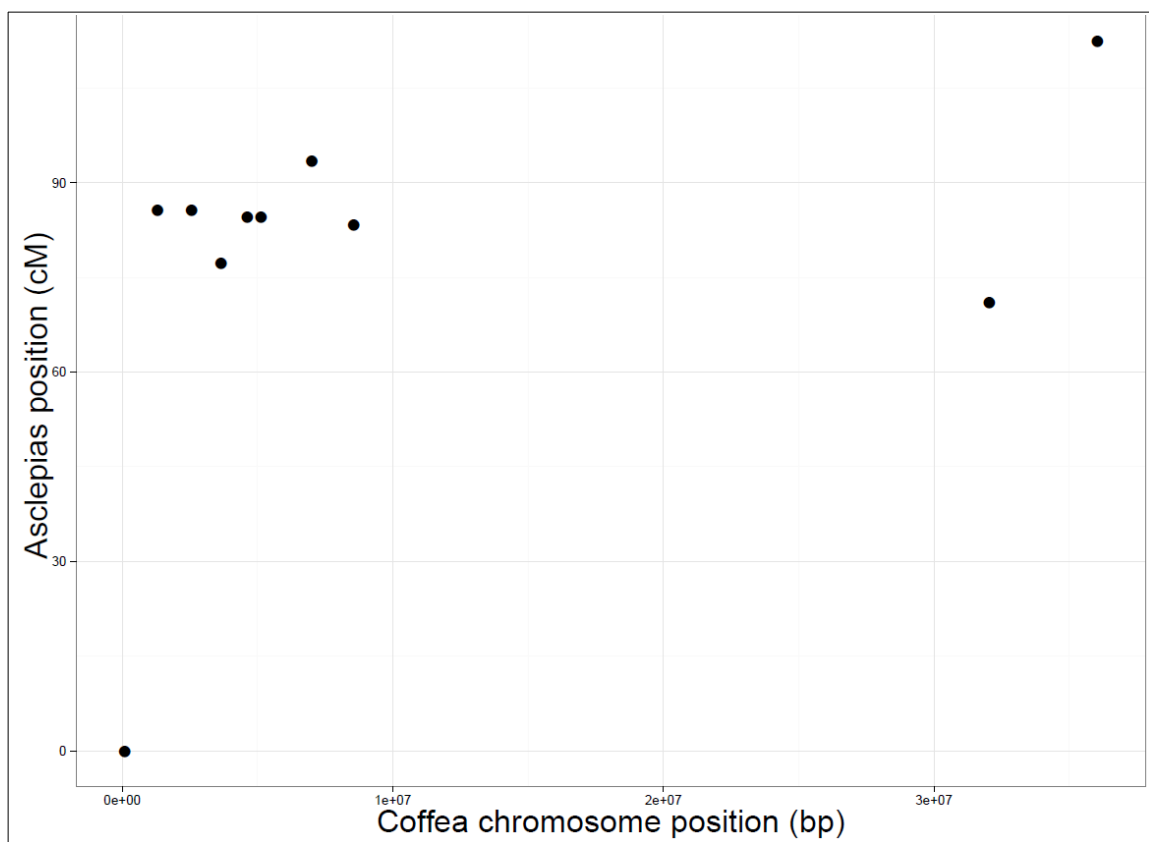

**Figure S7:** Synteny between *Asclepias* linkage group 9 and *Coffea* pseudochromosome 1.

A subset of scaffolds from *Asclepias* linkage group 9 mapped to their positions on *Coffea canephora* pseudochromosome 1, and ordered along the y-axis by recombination distance within *Asclepias*.

**Table S1:** Shared orthogroups among *Asclepias*, *Catharanthus*, *Coffea*, and *Vitis*.

Values along the diagonal are the number of orthogroups found within that genus.

|                            | <b><i>Asclepias</i></b> | <b><i>Catharanthus</i></b> | <b><i>Coffea</i></b> | <b><i>Vitis</i></b> |
|----------------------------|-------------------------|----------------------------|----------------------|---------------------|
| <b><i>Asclepias</i></b>    | 9,837                   | 9,275                      | 9,439                | 8,753               |
| <b><i>Catharanthus</i></b> |                         | 12,709                     | 12,111               | 11,072              |
| <b><i>Coffea</i></b>       |                         |                            | 13,233               | 11,688              |
| <b><i>Vitis</i></b>        |                         |                            |                      | 12,117              |



**Table S2:** Genomic coordinates of *Asclepias* P5 $\beta$ R genes.

Under **Scaffold ID** the linkage group of the scaffold is preceded by “LG.” These scaffold IDs refer to sequences provided in the Oregon State University institutional archive (Weitemier, 2017; doi.org/10.7267/N9M61HDR). **NCBI ID:** The scaffold IDs as given in NCBI/GenBank. **Called:** Whether the gene prediction consensus accurately predicted the correct exons. The prediction that failed did predict a gene product, but included exons from adjacent genes.  $\Psi$ -progesterone 5 $\beta$ -reductase was accurately predicted to not produce a product.

| <b>Gene</b>                               | <b>Scaffold ID</b>  | <b>NCBI ID</b> | <b>Start</b> | <b>Stop</b> | <b>Called</b> |
|-------------------------------------------|---------------------|----------------|--------------|-------------|---------------|
| Progesterone 5 $\beta$ -reductase 1       | LG11_scaffold_m502  | MSXX01042206.1 | 31537        | 33459       | No            |
| $\Psi$ -progesterone 5 $\beta$ -reductase | LG11_scaffold_m502  | MSXX01042206.1 | 33942        | 34876       | NA            |
| Progesterone 5 $\beta$ -reductase 6       | LG00_scaffold217668 | MSXX01007058.1 | 1305         | 136         | Yes           |
